# Supplementary material
Source: PubMed Central journal article supplement (PMC5683414)
Supplement: NIHMS906106-supplement-1.pdf [file NIHMS906106-supplement-1.pdf]

**A** E17.5 Collecting Duct (median)

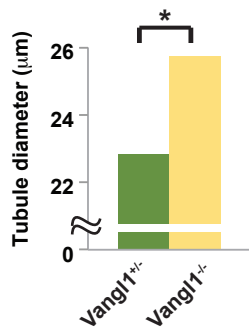

**B** E17.5 Proximal Tubule (median)

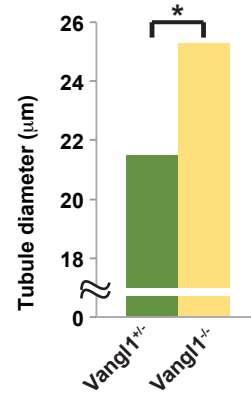

**C** Collecting duct diameter at E17.5 (μm)

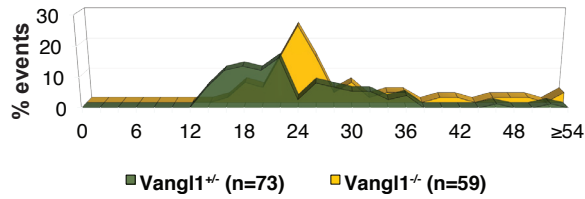

**D** Proximal tubule diameter at E17.5 (μm)

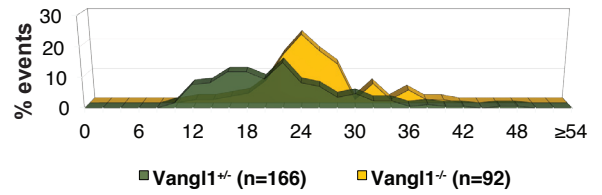

**Figure S1. *Vangl1* mutant tubule diameters are enlarged at E17.5. Related to Figure 1.**

Median collecting duct (A) and proximal tubule (B) diameters in control (*Vangl1*<sup>+/+</sup>) and *Vangl1*<sup>-/-</sup> mutant kidneys. (C-D) Distribution of diameters from (A) and (B), respectively. Measurements made using the low calcium dehydration method.

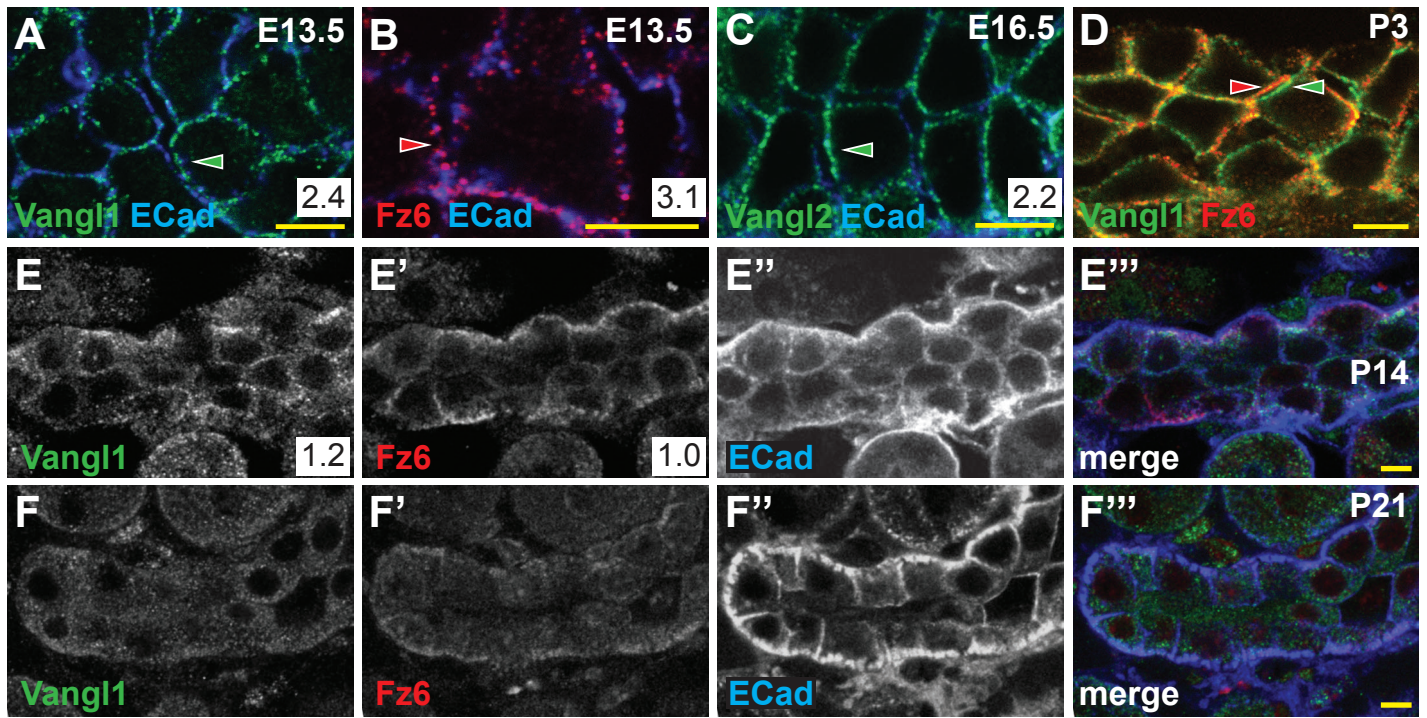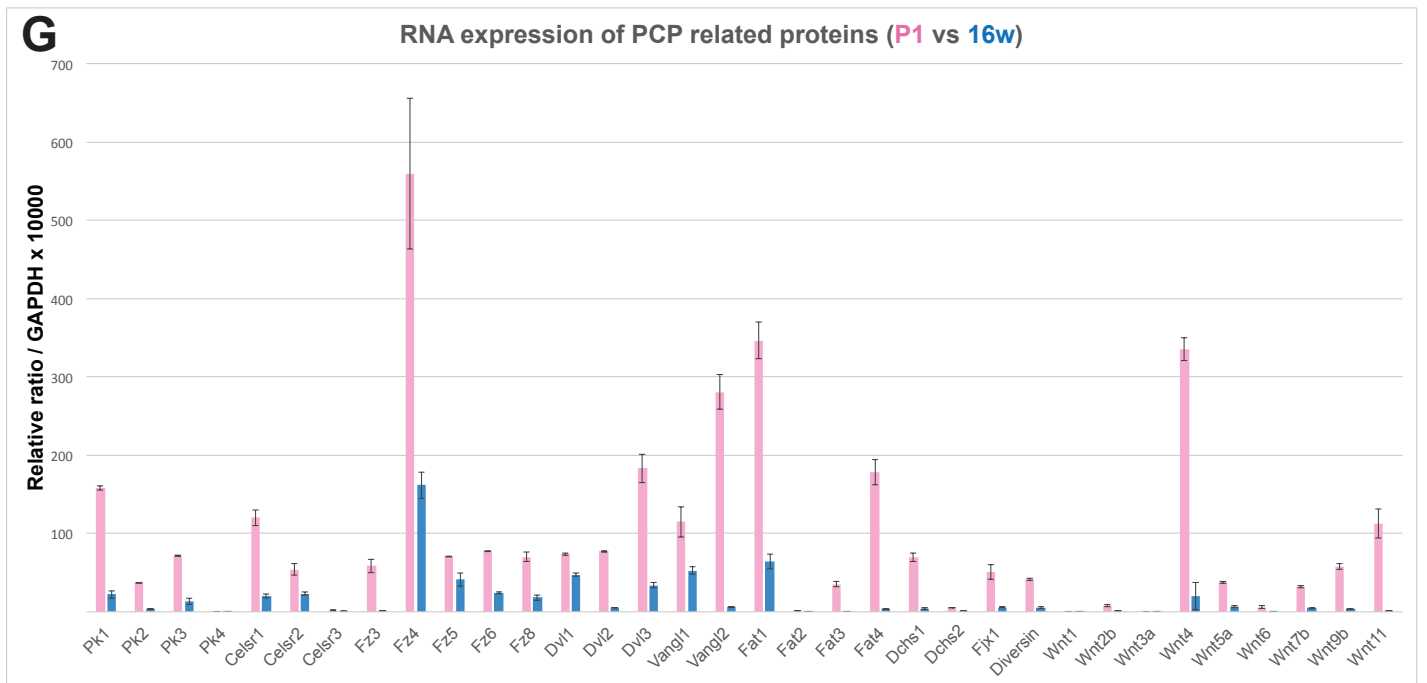

**Figure S2. Embryonic PCP protein asymmetric localization and expression declines postnatally. Related to Figure 2.** (A-F) Collecting ducts from WT kidneys stained for Vangl1 (green) or Fz6 (red) and E-Cadherin (blue) from age E13.5 to P21. Asymmetric Vangl1 and Fz6 localization are seen throughout embryonic stages and through P3. Membrane associated staining of PCP proteins declines after P3, with some residual membrane associated signal and mostly cytoplasmic signal evident at P15. By P21, minimal membrane associated signal remains. See also Figure 7 for comparable P30 images. (G) qPCR of PCP and related genes, normalized to GAPDH, at P1 and 16 weeks shows decreased gene expression over this time span. Scale bars: 5  $\mu$ m.

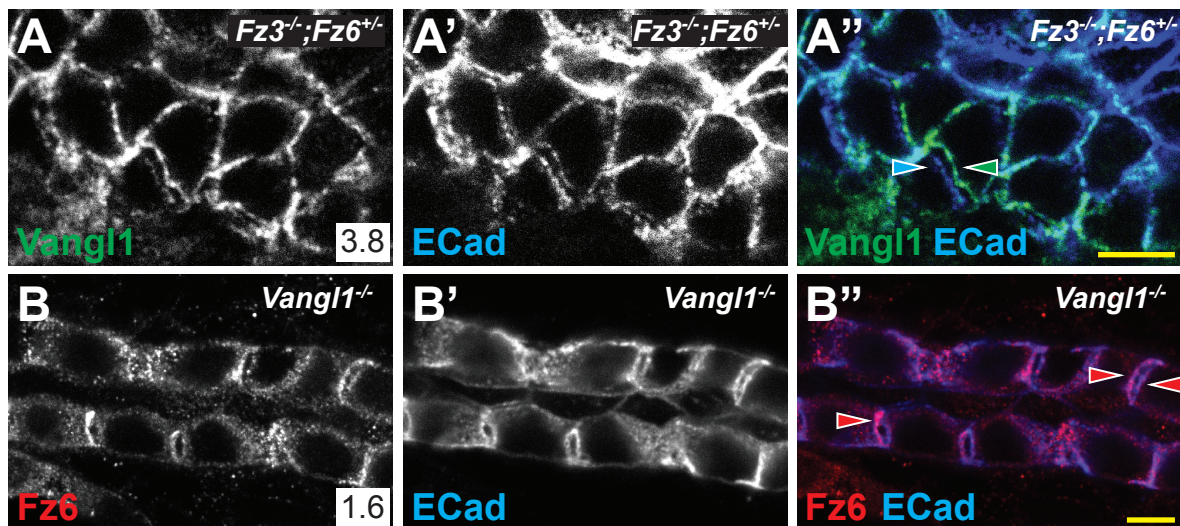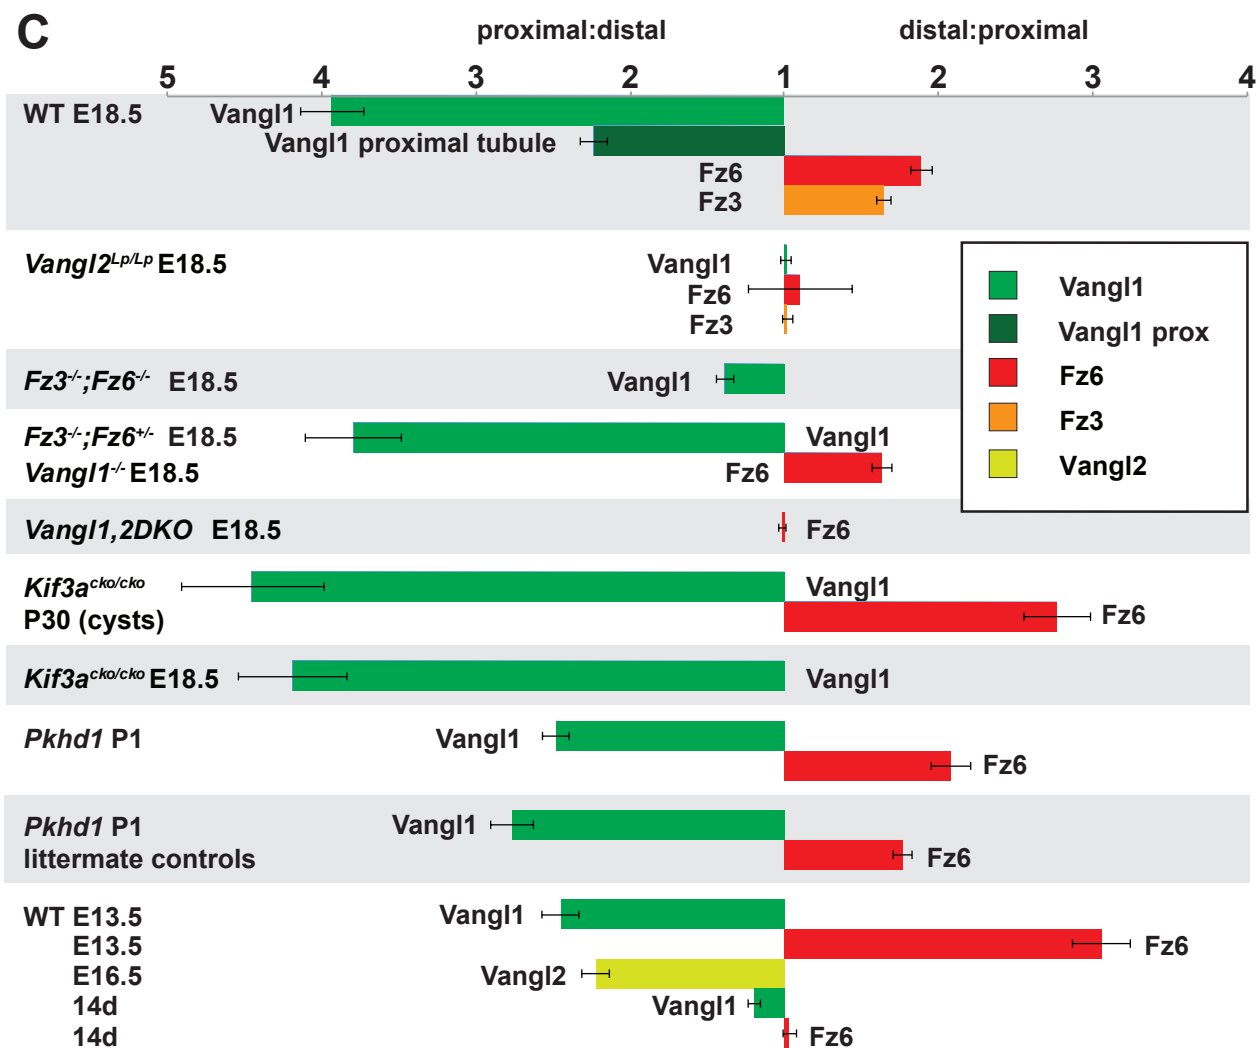

**Figure S3. Asymmetric localization of core PCP protein localization in E18.5 PCP mutants. Related to Figure 3.** (A-A'') Vangl1 (green) and E-Cadherin (blue) in *Fz3<sup>-/-</sup>; Fz6<sup>+/-</sup>* kidneys. One copy of Fz6 is sufficient to support PCP signaling as assessed by Vangl1 asymmetric localization. (B-B'') Fz6 (red) and E-Cadherin (blue) in a *Vangl1<sup>-/-</sup>* mutant collecting duct. Asymmetric localization of Fz6 is modestly diminished though not lost. Scale bars: 5  $\mu$ m. (C) Graph of Intensity Ratios (IRs) representing asymmetry of core PCP protein distributions for conditions examined throughout the manuscript. All values are for collecting ducts unless marked otherwise. Ratios are shown  $\pm$  SEM. See STAR Methods for method of measurement.

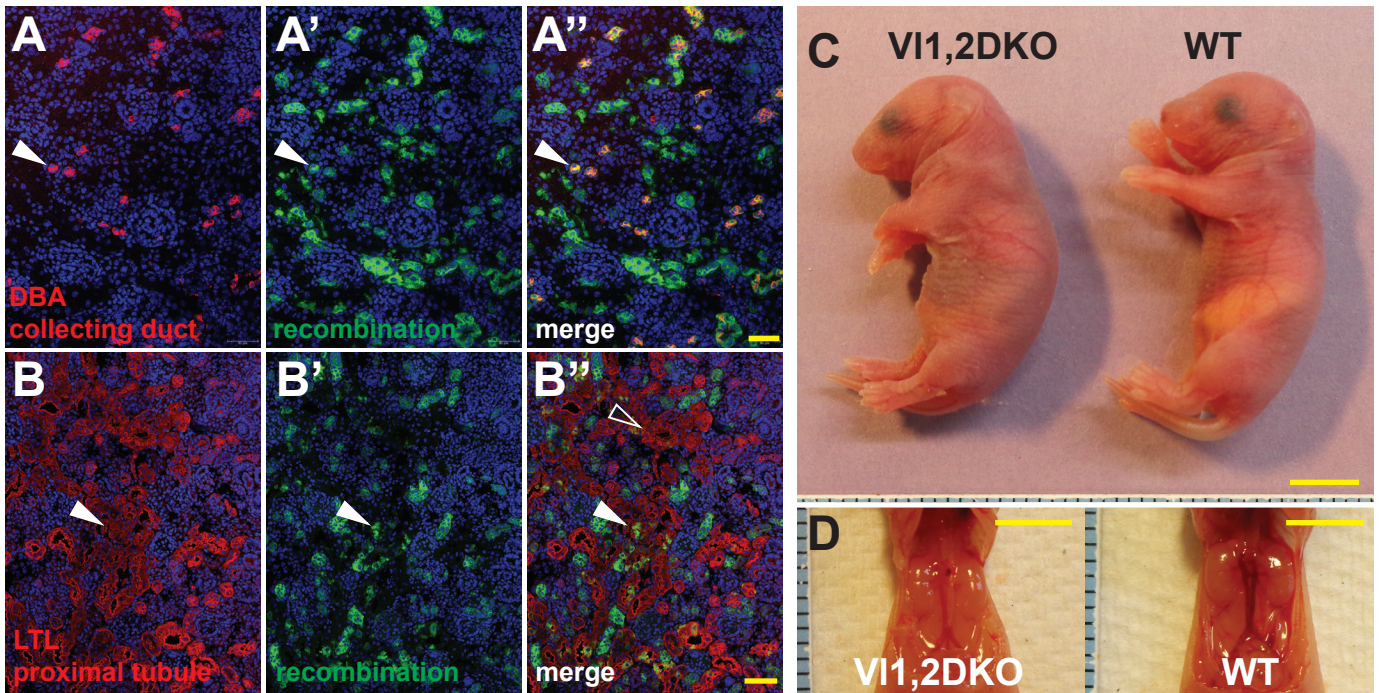

Low calcium dehydration method

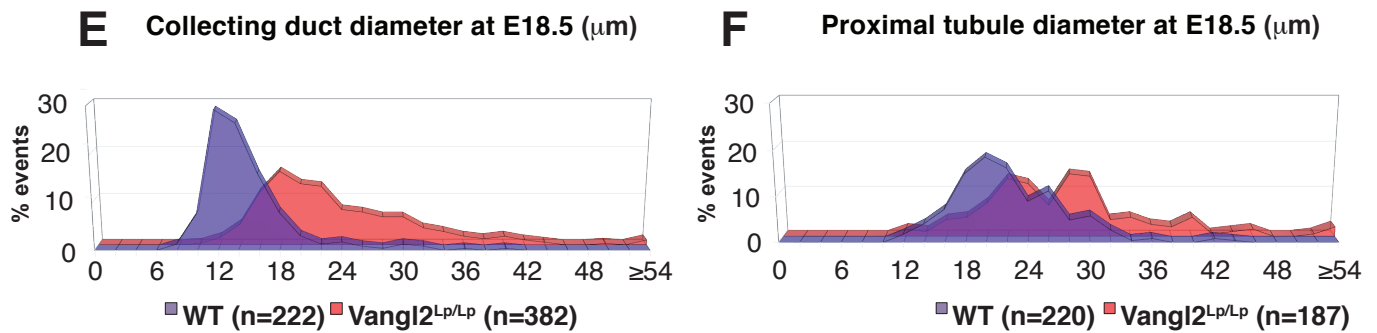

Standard fixation method

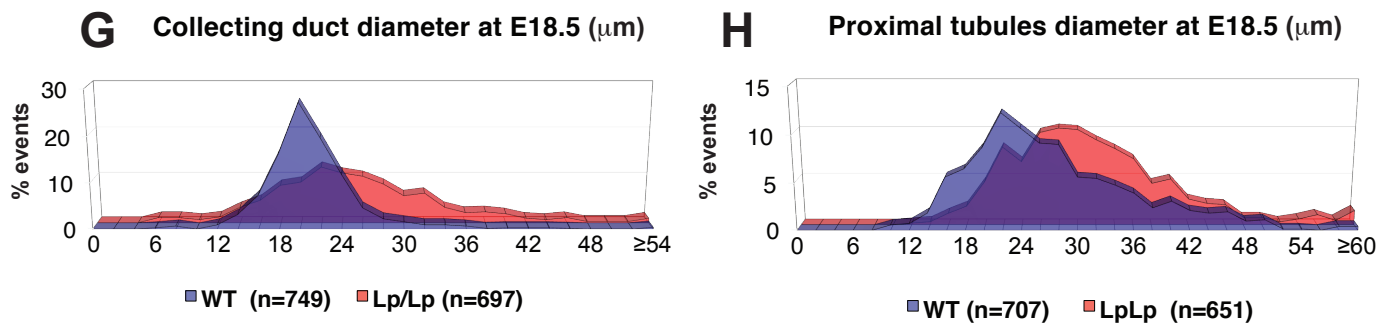

**Figure S4. Validation of the Vangl1,2 DKO mutant kidneys. Related to Figure 4.** The mTmG reporter [S1] in P1 V1,2DKO kidneys stained for AQP2 (A-A''; red; collecting duct) or LTL (B-B''; red; proximal tubules) and DAPI (blue) showing only the GFP (green) signal from mTmG indicating recombination. Virtually all collecting duct cells display recombination, and a small number of proximal tubule cells show recombination. (C-D) Gross views of V1,2DKO and control mice and kidneys. (E-H) Comparison of the low calcium dehydration fixation and standard fixation for measurement of tubule diameters. Low calcium dehydration fixation data (E-F) are from Figure 1 J and K, respectively. The same relationships, but with different absolute values, are observed. Scale bars: A'',B'', 50  $\mu$ m; C,D, 5 mm.



## Collecting Duct

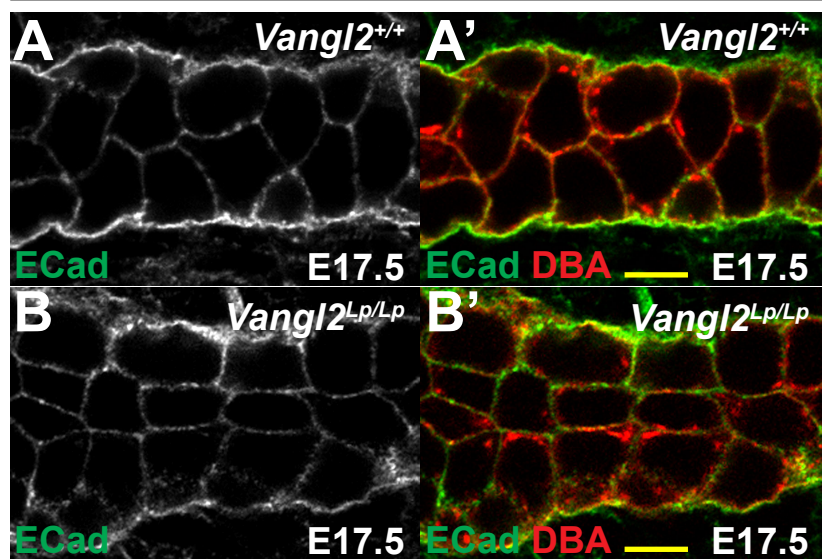

## Proximal Tubule

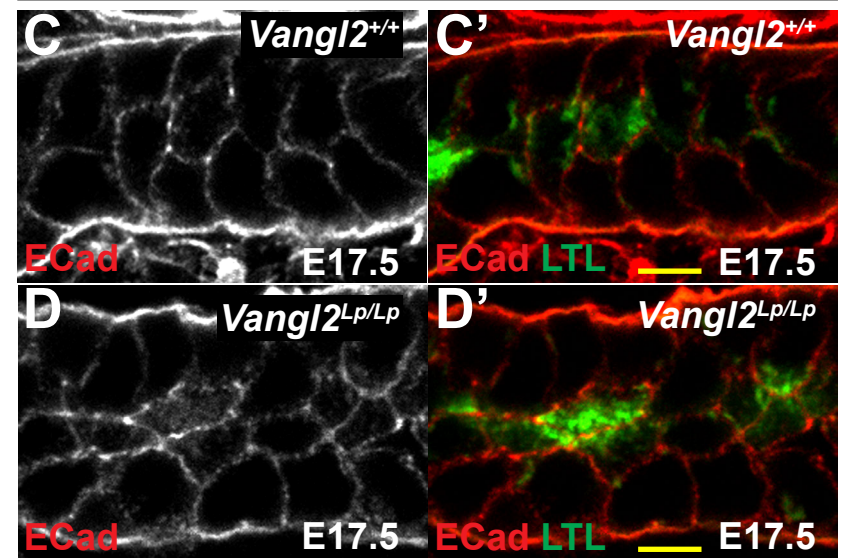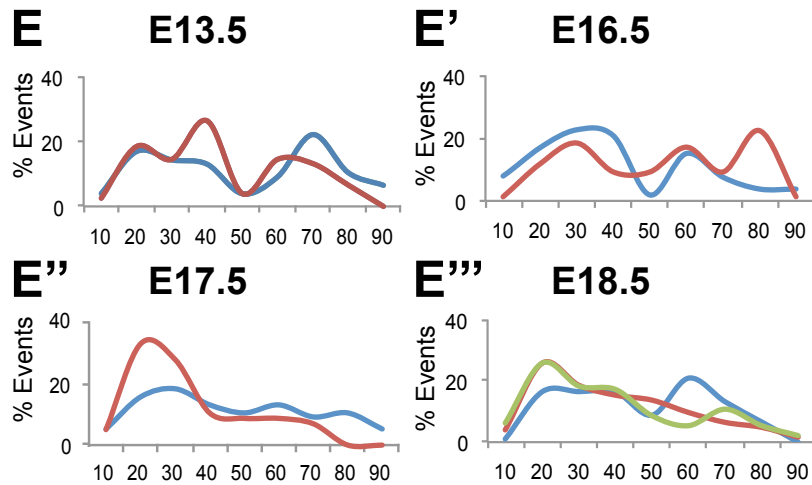

■ WT  
 ■ *Vangl2*<sup>Lp/Lp</sup>  
 ■ *Fz3*<sup>-/-</sup>; *Fz6*<sup>-/-</sup>

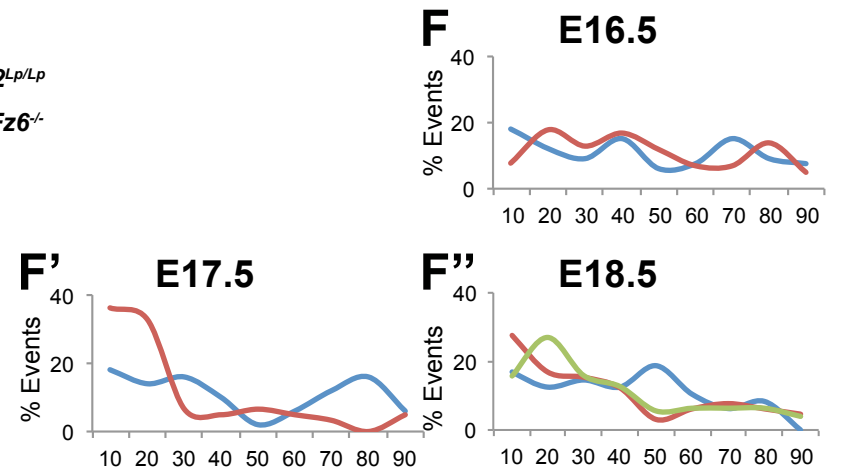

Degrees from Tubule Axis

**Figure S5. Cell shapes suggesting CE in E17.5 collecting duct and proximal tubule.**

**Related to Figure 5.** (A-B') WT control or *Vangl2*<sup>Lp/Lp</sup> collecting ducts stained for E-Cadherin (green) and DBA (red) to illustrate altered cell shape and orientation in the mutant. (C-D') WT control or *Vangl2*<sup>Lp/Lp</sup> proximal tubules stained for E-Cadherin (red) and LTL (green) to illustrate altered cell shape and orientation in the mutant. (E-E'') Plots of orientation of cellular long axes relative to the tubule axis for WT control, *Vangl2*<sup>Lp/Lp</sup> and *Fz3*<sup>-/-</sup>; *Fz6*<sup>-/-</sup> collecting ducts from E13.5 to E18.5. (F-F'') Plots of orientation of cellular long axes relative to the tubule axis for WT control, *Vangl2*<sup>Lp/Lp</sup> and *Fz3*<sup>-/-</sup>; *Fz6*<sup>-/-</sup> proximal tubules from E16.5 to E18.5. We speculate that the biphasic distribution of wild type orientations may result from rosette configurations through which cells were shown to transition in *Xenopus* [S2]. Regardless, a shift toward the long axis is consistent with CE. Scale bars: 5  $\mu$ m.

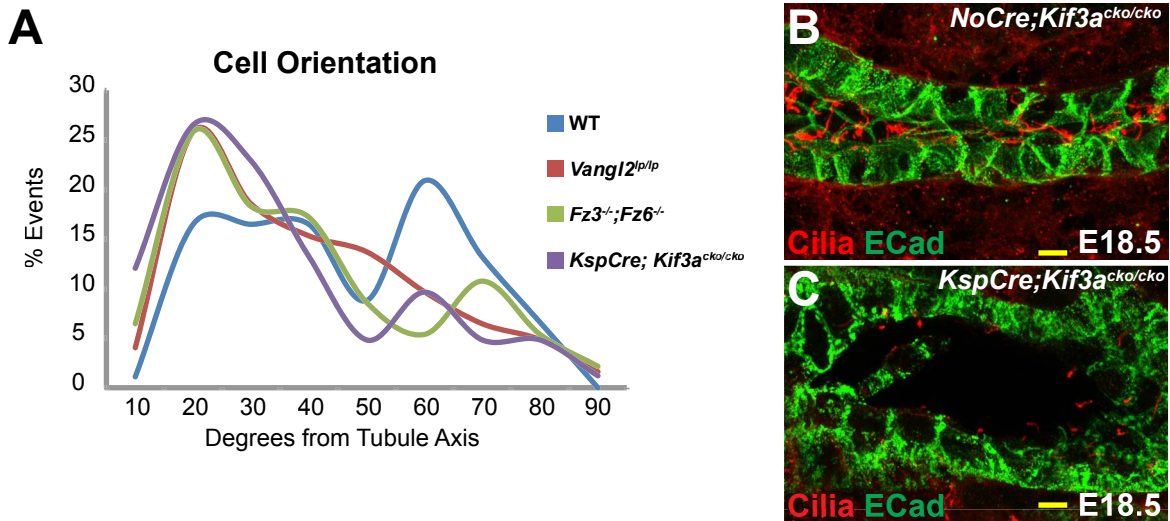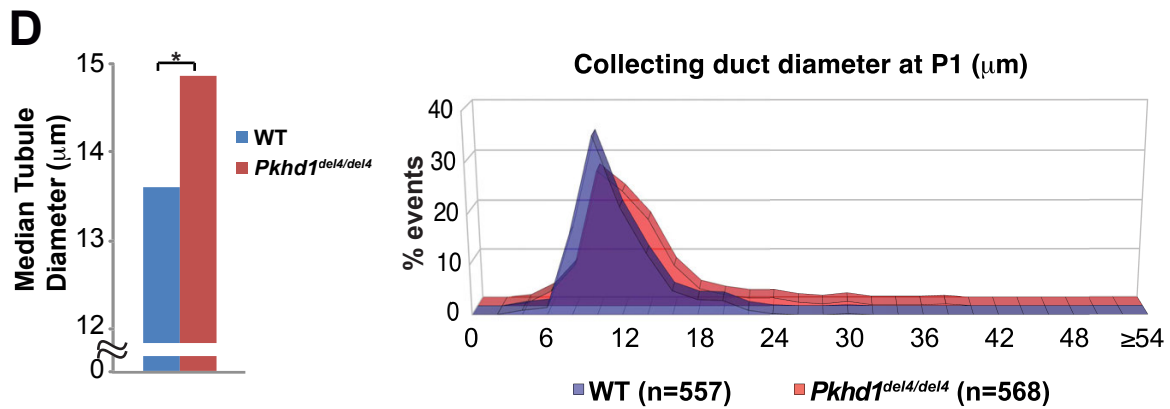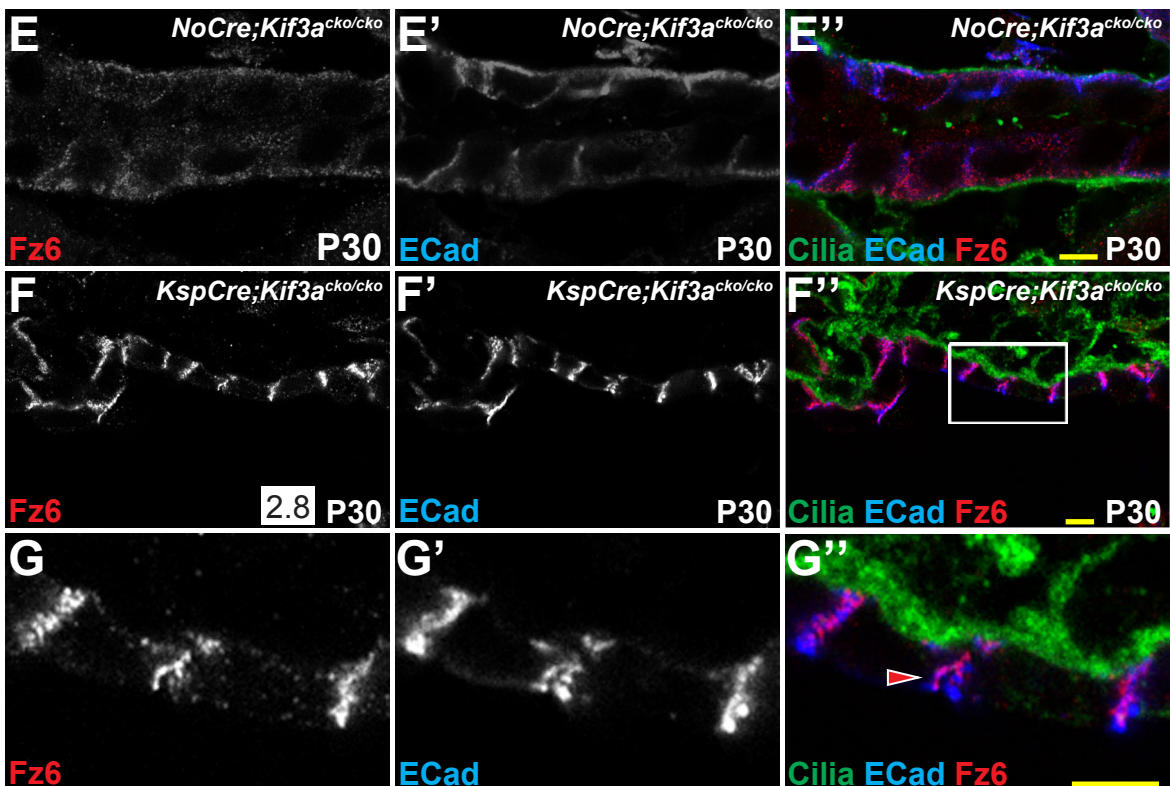

**Figure S6. Analysis of Kif3a mutant precystic and cystic kidneys. Related to Figure 6. (A)**

Plots of orientation of cellular long axes relative to the tubule axis for E18.5 *KspCre;Kif3a<sup>cko/cko</sup>* collecting ducts plotted with data for WT control, *Vangl2<sup>Lp/Lp</sup>* and *Fz3<sup>-/-</sup>; Fz6<sup>-/-</sup>* collecting ducts from Figure S5E'''. (B-C) WT control (*NoCre;Kif3a<sup>cko/cko</sup>*) and *KspCre;Kif3a<sup>cko/cko</sup>* collecting ducts stained at E18.5 for acetylated- $\alpha$ -tubulin (red; cilia) and E-Cadherin (green) showing residual short cilia in the mutant ducts. (D-D''') E18.5 *KspCre;Kif3a<sup>cko/cko</sup>* collecting duct stained for Vangl1 (green), E-Cadherin (blue), acetylated- $\alpha$ -tubulin (red; cilia) and DBA (white; collecting duct), showing asymmetric Vangl1 localization in precystic mutant. (E-E'') WT control (*NoCre;Kif3a<sup>cko/cko</sup>*) and (F-F'') *KspCre;Kif3a<sup>cko/cko</sup>* kidneys stained at P30 for Fz6 (red), E-Cadherin (blue) acetylated- $\alpha$ -tubulin (green; cilia). Low levels of mostly cytoplasmic Fz6 and E-Cadherin (overexposed in E-E'') remain in the WT control collecting ducts. Fz6 and E-Cadherin are strongly expressed in the *KspCre;Kif3a<sup>cko/cko</sup>* cysts. (G-G'') Higher magnification image of a *KspCre;Kif3a<sup>cko/cko</sup>* mutant cyst (boxed region of F) stained for Fz6 (red) and E-Cadherin (blue) showing asymmetric localization of Fz6 at a cell-cell junction that separated during fixation.

Scale bars: 5  $\mu$ m.

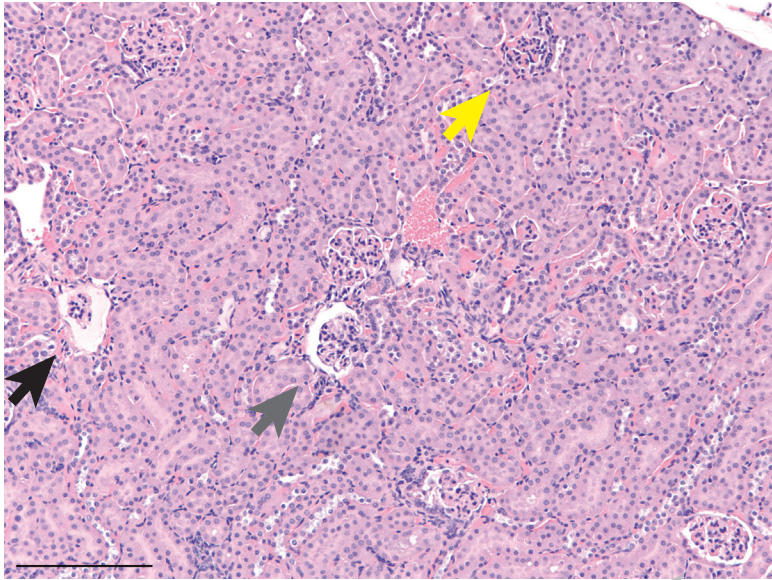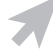

**Figure S7. V11,2DKO kidney showing the GCKD phenotype. Related to Figure 7.** 16w H&E stained kidney showing glomeruli with dilated capsules varying in severity (grey to black arrows) and one nearly normal glomerulus (yellow arrow). Scale bar: 200  $\mu$ m.

| age (weeks) | number of animals | animals with GCKD phenotype/<br>no. examined |
|-------------|-------------------|----------------------------------------------|
| 3           | 1                 | 0/1                                          |
| 16          | 10                | 1/9                                          |
| 24          | 1                 |                                              |
| 29          | 1                 |                                              |
| 32          | 1                 |                                              |
| 35          | 1                 | 0/1                                          |
| 50          | 1                 | 1/1                                          |

**Table S1. Vangl1,2 DKO mice examined for cysts. Related to Figure 4.**

| gene name | primer, sense         | primer, antisense     |
|-----------|-----------------------|-----------------------|
| GAPDH     | GACTTCAACAGCAACTCCCAC | TCCACCACCCTGTTGCTGTA  |
| Pk1       | GATGGAGAAAGCAAGCCAAG  | TGTGCAGCATGGAAGAGTTC  |
| Pk2       | ACATGGGCACTCTCAACTCC  | TGTATCCTAGGGGTTGCTG   |
| Pk3       | TGCTGTTTCGAGTGTGAAGC  | CATCACAGTATTCCGCATGG  |
| Pk4       | CCACAGGACAGTGATGAACG  | CCTTCAAGCTTAGGAGGCAG  |
| Celsr1    | ATGCTGTTGGTCAGCATGTC  | GGGATCTGGACAACAACCG   |
| Celsr2    | GCTGTGTGTGAGCATCTCGT  | CATCATGAGTGTGCTGGTGT  |
| Celsr3    | GGAGTTGAAAGAGGCAAGGA  | CTTCTCAGAGCCAGGGAGG   |
| Fzd3      | GAATCAGGTCTGGACGACTCA | CATCTGGGAGACAACATGGA  |
| Fzd4      | TGGCACATAAACCGAACAAA  | TACAACGTGACCAAGATGCC  |
| Fzd5      | GGATGATTAGGGCTCCGACT  | CCGCCACAGGTACCTAGCTT  |
| Fzd6      | AAAAGCTTGGCAAAGGAACA  | ATTATGACCAGGGGATCGCT  |
| Fzd8      | CGGTTGTGCTGCTCATAGAA  | CAGTCATCAAGCAGCAAGGA  |
| Dvl1      | GGCAACTTGGCATTGTCATC  | GGTGCACGCCTACAAATTCT  |
| Dvl2      | ACACAAGCCAGGAGACAACC  | TCCATGGATCAGGATTTTGG  |
| Dvl3      | CAGGGTAGCTTGGCATTGTC  | GCGGCCAGCTATAAGTTCT   |
| Vangl1    | GATGCTGTTAGGAGGTTCCG  | AGTCCCGCTTCTACAGCTTG  |
| Vangl2    | TGCTGGACAAGTGGGCTTAT  | GTGCGCTGCGGATACAAA    |
| Fat1      | ATTCCAAGCGACTCGAGAAA  | GAGGCAAGTTTGGAGCTACG  |
| Fat2      | ACCAGCTTGGACACTTCACC  | CAGCCACTTCTGTGTCCTCA  |
| Fat3      | TCACGGGAACAACTGTGAA   | CACACTCGTCCACATCATCC  |
| Fat4      | TCCGTCCAGAGTGGTGTCAAG | GTTGGCCACAATGATGACAG  |
| Dachsous1 | AGTGGAACAACCACCTCTGG  | GGCCTAGAGCAGTGTGGGTA  |
| Dachsous2 | TCAGCGGCAACTTACACAAC  | GGTCAGACGCAAGAATCACA  |
| Fjx1      | TCTTCGGATCCAATCTCCAC  | GTTCTGGAAGGGCAAACCTCA |
| Diversin  | TTGTGAGGCCCAAGGATAAG  | TCCAGTCTGCTGATCACACC  |
| Wnt1      | TAGTCGCAGGTGCAGGACTC  | CTCTTCGGCAAGATCGTCA   |
| Wnt2b     | TGCTGGGTAGCGTTGACAC   | CTGCTGCTGCTACTCCTGACT |
| Wnt3a     | GGTGGCTTTGTCCAGAACAG  | ACTACGTGGAGATCATGCC   |
| Wnt4      | TCTGGATCAGGCCTTTGAGT  | CCTGCGACTCCTCGTCTTC   |
| Wnt5a     | CCGGGCTTAATATTCCAATG  | ACGCTTCGCTTGAATTCT    |
| Wnt6      | CCTGCAGATGCTGGTAGGAT  | CGGTAGAGCTCTCAGGATGC  |
| Wnt7b     | CTCCCCGATCACAATGATG   | GCGTCCTCTACGTGAAGCTC  |
| Wnt9b     | GGAAGGGTGTGTCAGGACCTC | CGAGGAGATGCGAGAGTGC   |
| Wnt11     | AGGCCCTCCAGCTGTTTAC   | GTCTGCGAGGCTCTGCTCT   |

**Table S2. Primers for qPCR. Related to STAR Methods.**

## Supplemental References

- S1. Muzumdar, M.D., Tasic, B., Miyamichi, K., Li, L., and Luo, L. (2007). A global double-fluorescent Cre reporter mouse. *Genesis* *45*, 593-605.
- S2. Lienkamp, S.S., Liu, K., Karner, C.M., Carroll, T.J., Ronneberger, O., Wallingford, J.B., and Walz, G. (2012). Vertebrate kidney tubules elongate using a planar cell polarity-dependent, rosette-based mechanism of convergent extension. *Nat Genet* *44*, 1382-1387.
